# Supplementary material
Source: Springer Nature journal article supplement (https://www.springermedizin.de/resource/supplementary/12913_2013_3764_MOESM1_ESM.pdf/9533278)
Supplement: MOESM1 [file 9533278]

1) Paper implementation

```
graph TD; A[1) Paper implementation] --> B[2) Process implementation]; B --> C[3) Performance implementation];
```

2) Process implementation

3) Performance implementation
